# Supplementary material
Source: Springer Nature journal article supplement (https://www.springermedizin.de/resource/supplementary/13020_2011_214_MOESM2_ESM.pdf/9641222)

(A)

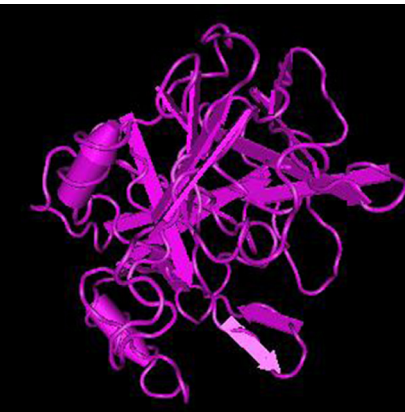

(B)

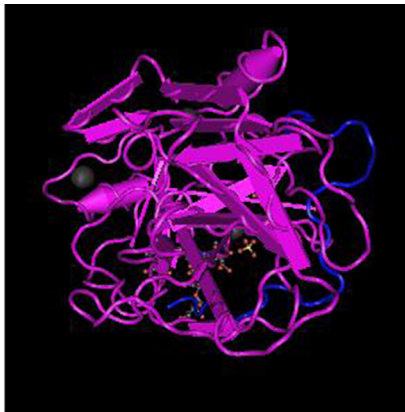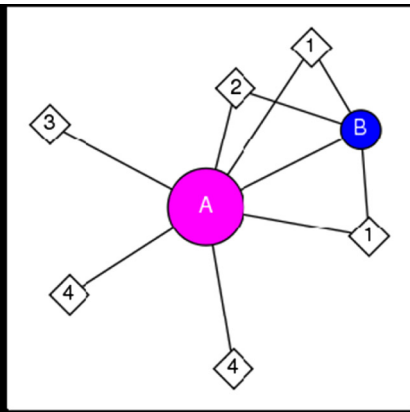

Supplement: MOESM2 [file 9641222]
